# Supplementary material
Source: PubMed Central journal article supplement (PMC3774511)
Supplement: supp_01408.2009_tableS1.pdf [file supp_01408.2009_tableS1.pdf]

Supplement Table A Resting on Bicycle

| Group                            | ExDex (N=7)   |             |             |         | Interaction |
|----------------------------------|---------------|-------------|-------------|---------|-------------|
| Condition                        | Pre           | Post        | %           | P value | P Value     |
| VO2 rest, L/min                  | 0.35 ± 0.02   | 0.40 ± 0.01 | 14.2 ± 4.7  | 0.017*  | 0.107       |
| VO2 rest, ml/kg/min              | 4.7 ± 0.3     | 5.5 ± 0.3   | 16.8 ± 4.5  | 0.008*  | 0.047*      |
| A-V DO2 rest, ml/dl              | 6.4 ± 1.0     | 8.0 ± 0.9   | 28.4 ± 7.4  | 0.007*  | 0.002*      |
| Qc rest, L/min                   | 6.2 ± 0.7     | 5.5 ± 0.7   | -8.3 ± 7.1  | 0.144   | 0.285       |
| Qci rest, L/min/m <sup>2</sup>   | 3.2 ± 0.5     | 2.9 ± 0.5   | -8.3 ± 7.1  | 0.145   | 0.285       |
| HR rest, bpm                     | 91 ± 4        | 109 ± 7     | 18.8 ± 4.5  | 0.005*  | 0.942       |
| SV rest, ml/beat                 | 65 ± 8        | 50 ± 8      | -23.9 ± 5.2 | 0.008*  | 0.426       |
| SVi rest, ml/beat/m <sup>2</sup> | 33 ± 5        | 26 ± 5      | -23.9 ± 5.2 | 0.008*  | 0.426       |
| Group                            | ExNoVol (N=7) |             |             |         |             |
| Condition                        | Pre           | Post        | %           | P value |             |
| VO2 rest, L/min                  | 0.36 ± 0.03   | 0.42 ± 0.03 | 17.5 ± 5.6  | 0.036*  |             |
| VO2 rest, ml/kg/min              | 4.5 ± 0.2     | 5.4 ± 0.4   | 20.4 ± 5.1  | 0.007*  |             |
| A-V DO2 rest, ml/dl              | 6.1 ± 0.3     | 8.3 ± 0.2   | 39.3 ± 8.6† | 0.002*  |             |
| Qc rest, L/min                   | 5.9 ± 0.3     | 5.0 ± 0.4   | -16.0 ± 3.7 | 0.003*  |             |
| Qci rest, L/min/m <sup>2</sup>   | 3.0 ± 0.2     | 2.5 ± 0.2   | -16.0 ± 3.7 | 0.011*  |             |
| HR rest, bpm                     | 90 ± 6        | 105 ± 3     | 21.9 ± 13.6 | 0.127   |             |
| SV rest, ml/beat                 | 71 ± 7        | 47 ± 4      | -31.1 ± 6.1 | 0.014*  |             |
| SVi rest, ml/beat/m <sup>2</sup> | 35 ± 3        | 23 ± 2      | -31.1 ± 6.1 | 0.009*  |             |
| Group                            | SedDex (N=7)  |             |             |         |             |
| Condition                        | Pre           | Post        | %           | P value |             |
| VO2 rest, L/min                  | 0.36 ± 0.03   | 0.36 ± 0.02 | 2.1 ± 4.9   | 0.888   |             |
| VO2 rest, ml/kg/min              | 4.2 ± 0.7     | 4.8 ± 0.2   | 3.2 ± 4.6   | 0.658   |             |
| A-V DO2 rest, ml/dl              | 6.4 ± 0.8     | 6.8 ± 0.9   | 7.2 ± 4.5   | 0.098   |             |
| Qc rest, L/min                   | 5.9 ± 0.4     | 5.6 ± 0.5   | -4.5 ± 3.5  | 0.303   |             |
| Qci rest, L/min/m <sup>2</sup>   | 3.0 ± 0.3     | 2.9 ± 0.3   | -4.5 ± 3.5  | 0.345   |             |
| HR rest, bpm                     | 100 ± 4       | 124 ± 8     | 22.9 ± 5.5  | 0.007*  |             |
| SV rest, ml/beat                 | 59 ± 4        | 47 ± 5      | -21.0 ± 5.3 | 0.004*  |             |
| SVi rest, ml/beat/m <sup>2</sup> | 30 ± 3        | 24 ± 3      | -21.0 ± 5.3 | 0.005*  |             |

2 Values are Mean±SE. VO2 rest; resting oxygen uptake, AV DO2 rest; resting arteriovenous  
3 oxygen difference, Qc rest; resting cardiac output, Qci rest; Qc rest divided by body surface area,  
4 HR rest; resting heart rate, SV rest; resting stroke volume, and Svi rest; SV rest divided by body  
5 surface area. Pre vs. post was compared with paired t-tests. % changes were compared with one-  
6 way ANOVA with a Turkey post-hoc test for interaction among groups. \*: P<0.05 for pre vs.  
7 post or interaction, †: P<0.05 vs. SedDex.
