# Supplementary material
Source: PubMed Central journal article supplement (PMC3774511)
Supplement: supp_01408.2009_tableS2.pdf [file supp_01408.2009_tableS2.pdf]

Supplement Table B Peak Cycling Exercise

| Group                           | ExDex (N=7)   |             |              |         | Interaction |
|---------------------------------|---------------|-------------|--------------|---------|-------------|
| Condition                       | Pre           | Post        | %            | P value | P Value     |
| VO2 max, L/min                  | 2.85 ± 0.26   | 2.81 ± 0.20 | -0.3 ± 2.9†  | 0.624   | 0.014*      |
| VO2 max, ml/kg/min              | 38.2 ± 4.3    | 38.6 ± 3.7  | 2.2 ± 3.0†   | 0.704   | 0.006*      |
| A-V DO2 Max, ml/dl              | 11.5 ± 0.6    | 14.5 ± 1.5  | 28.4 ± 13.8  | 0.092   | 0.174       |
| Qc max, L/min                   | 23.9 ± 2.3    | 19.8 ± 2.3  | -13.7 ± 11.6 | 0.233   | 0.778       |
| Qci max, L/min/m <sup>2</sup>   | 12.1 ± 1.2    | 10.0 ± 1.3  | -13.7 ± 11.6 | 0.233   | 0.778       |
| HR max, bpm                     | 178 ± 3       | 183 ± 3     | 2.7 ± 1.2    | 0.065   | 0.543       |
| SV max, ml/beat                 | 133 ± 11      | 108 ± 12    | -16.3 ± 10.7 | 0.165   | 0.872       |
| SVi max, ml/beat/m <sup>2</sup> | 67 ± 6        | 55 ± 7      | -16.3 ± 10.7 | 0.167   | 0.872       |
| Peak Workload, watts            | 217 ± 15      | 226 ± 14    | 5.0 ± 2.6†   | 0.095   | 0.036*      |
| Group                           | ExNoVol (N=7) |             |              |         |             |
| Condition                       | Pre           | Post        | %            | P value |             |
| VO2 max, L/min                  | 2.96 ± 0.40   | 2.76 ± 0.30 | -4.7 ± 4.6   | 0.343   |             |
| VO2 max, ml/kg/min              | 35.9 ± 3.2    | 35.0 ± 2.9  | -1.6 ± 4.6†  | 0.672   |             |
| A-V DO2 Max, ml/dl              | 12.0 ± 0.9    | 14.2 ± 0.9  | 20.0 ± 7.4   | 0.053   |             |
| Qc max, L/min                   | 24.7 ± 2.1    | 19.4 ± 1.8  | -21.6 ± 3.4  | 0.001*  |             |
| Qci max, L/min/m <sup>2</sup>   | 12.2 ± 0.8    | 9.5 ± 0.7   | -21.6 ± 3.4  | 0.001*  |             |
| HR max, bpm                     | 184 ± 5       | 184 ± 5     | 0.0 ± 2.5    | 0.949   |             |
| SV max, ml/beat                 | 136 ± 10      | 107 ± 10    | -21.1 ± 4.6  | 0.005*  |             |
| SVi max, ml/beat/m <sup>2</sup> | 67 ± 4        | 52 ± 4      | -21.1 ± 4.6  | 0.003*  |             |
| Peak Workload, watts            | 214 ± 26      | 216 ± 22    | 2.4 ± 6.2    | 0.928   |             |
| Group                           | SedDex (N=7)  |             |              |         |             |
| Condition                       | Pre           | Post        | %            | P value |             |
| VO2 max, L/min                  | 2.54 ± 0.18   | 2.03 ± 0.13 | -19.1 ± 4.8  | 0.012*  |             |
| VO2 max, ml/kg/min              | 33.2 ± 1.7    | 27.3 ± 2.1  | -17.9 ± 4.4  | 0.008*  |             |
| A-V DO2 Max, ml/dl              | 12.8 ± 1.0    | 12.6 ± 1.3  | -0.4 ± 9.9   | 0.845   |             |
| Qc max, L/min                   | 20.3 ± 1.8    | 16.9 ± 1.5  | -14.3 ± 8.9  | 0.181   |             |
| Qci max, L/min/m <sup>2</sup>   | 10.3 ± 0.6    | 8.6 ± 0.8   | -14.3 ± 8.9  | 0.172   |             |
| HR max, bpm                     | 183 ± 3       | 185 ± 4     | 1.1 ± 1.0    | 0.295   |             |
| SV max, ml/beat                 | 111 ± 9       | 91 ± 8      | -15.3 ± 8.8  | 0.148   |             |
| SVi max, ml/beat/m <sup>2</sup> | 56 ± 3        | 47 ± 4      | -15.3 ± 8.8  | 0.135   |             |
| Peak Workload, watts            | 203 ± 13      | 174 ± 13    | -13.4 ± 5.3  | 0.073   |             |

2 Values are Mean±SE. VO2 max; maximal oxygen uptake, AV DO2 Max; maximal  
3 arteriovenous oxygen difference, Qc max; maximal cardiac output, Qci max; Qc max divided by  
4 body surface area, HR max; maximal heart rate, SV max; maximal stroke volume, and Svi max;  
5 SV max divided by body surface area. Pre vs. post was compared with paired t-tests. % changes  
6 were compared with one-way ANOVA with a Turkey post-hoc test for interaction among groups.  
7 \*: P<0.05 for pre vs. post or interaction, †: P<0.05 vs. SedDex.
